# Supplementary material
Source: PubMed Central journal article supplement (PMC3366550)

## Supporting Information

### Temperature Dependence of Carbonyl Backbone Dynamics in Chicken Villin Headpiece Subdomain

Liliya Vugmeister\*<sup>1</sup>, Dmitry Ostrovsky<sup>2</sup>

<sup>1</sup>*Department of Chemistry and Environment and Natural Resources Institute, University of Alaska at Anchorage, 3211 Providence Drive, Anchorage AK, 99508. Corresponding author, email: [aflv@uaa.alaska.edu](mailto:aflv@uaa.alaska.edu). Telephone: (907) 786-4709. Fax: (907) 786-4607*

<sup>2</sup>*Department of Mathematical Sciences, University of Alaska at Anchorage, 3211 Providence Drive, Anchorage AK, 99508*

#### **S1. The analysis of behavior of the order parameters and internal correlation times as a function of $\tau_e/\tau_c$ values using synthetic data sets.**

In order to analyze the influence of the value of the  $\tau_e/\tau_c$  ratio on the stability of the fitted values of the order parameter and internal correlation times we have done the following analysis using synthetic  $R_I$ ,  $R_{C'/C'-C\alpha}$  and  $R_{C'/C'-N}$  rates.

First, synthetic  $R_I$ ,  $R_{C'/C'-C\alpha}$  and  $R_{C'/C'-N}$  rates were created with the use of the spectral density functions given by sEq. (1) of the main text for  $S^2 = 0.6, 0.8, 0.9$  and  $\tau_e/\tau_c$  values between 0.1 and 0.5.  $C_{\text{iso}} = 175$  and  $\theta = 155^\circ$ . We then fitted these synthetic rates with the  $\chi^2$  minimization procedure, taking “experimental” errors as 3%, 5%, and 7% of the average values for  $R_I$ ,  $R_{C'/C'-C\alpha}$  and  $R_{C'/C'-N}$ , respectively. These results are presented in Figure S1 for  $S^2 = 0.8$ .

For the results presented in Figure S2, the synthetic rates were altered by adding normally distributed random noise; we have used the standard deviations of 3%, 5%, and 7% of the average values of  $R_I$ ,  $R_{C'/C'-C\alpha}$  and  $R_{C'/C'-N}$ , respectively. These standard deviations mimic actual experimental errors. Ten runs were done.

**Results:** fitted values of  $\tau_e/\tau_c$  reproduce input values with a reasonable accuracy only for the input values of  $\tau_e/\tau_c$  below a certain threshold. When no random noise is included the approximate thresholds are given by 0.45, 0.35 and 0.15 for  $S^2$  of 0.6, 0.8, and 0.9, respectively. When the random noise is added, the thresholds change to about 0.3, 0.2 and 0.1 for  $S^2$  of 0.6, 0.8, and 0.9, respectively. On the contrary, the fitted values of  $S^2$  are stable for all values of  $\tau_e/\tau_c$ , regardless of whether the noise was added to the synthetic data. The simulated errors in  $S^2$  values are also stable. Thus, we conclude that neither the stability of the fitted  $S^2$  values nor their errors depend on the quality of  $\tau_e$  fits and, therefore, can be well-defined even for those experimental situations which do not allow for a reliable determination of the internal correlation times.

**Figure S1.** Fitted internal correlation times and order parameters as a function of  $\tau_e/\tau_c$  ratio for  $S^2=0.8$ . No random noise is included in the synthetic  $R_I$ ,  $R_{C'/C-\alpha}$  and  $R_{C'/C-N}$  relaxation rates.

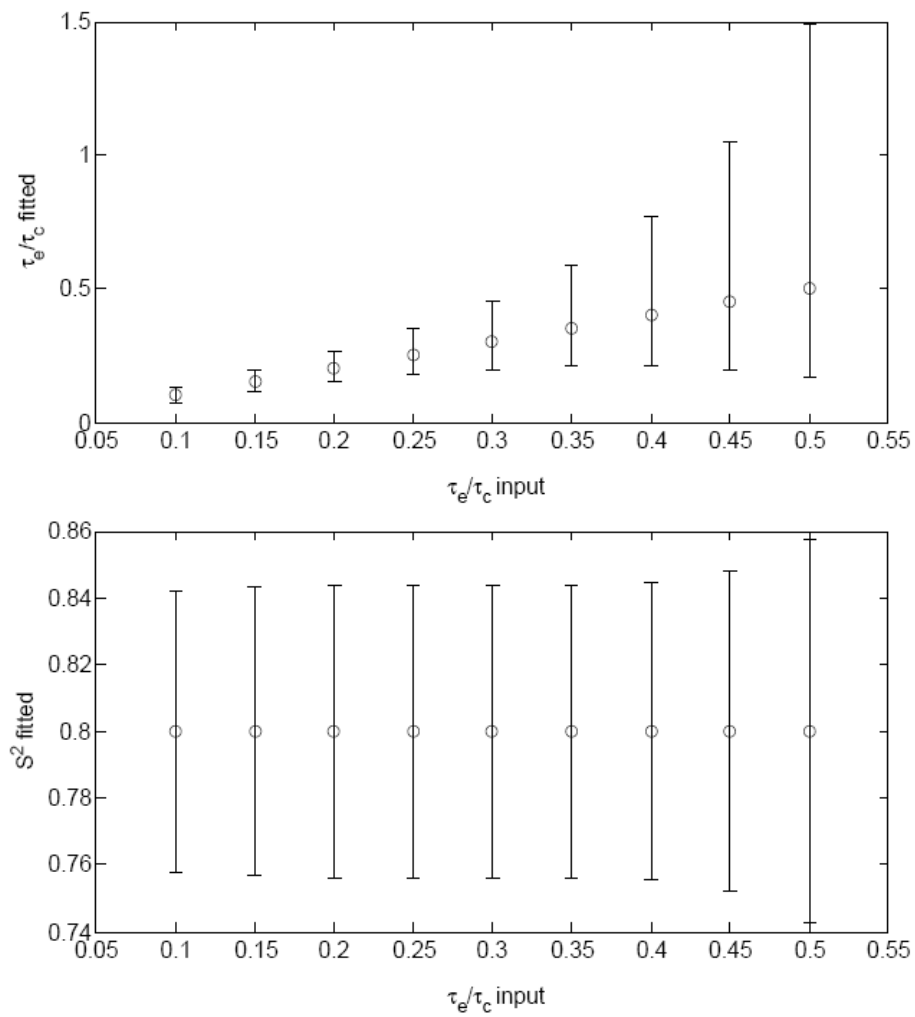

**Figure S2.** Fitted internal correlation times and order parameters as a function of  $\tau_e/\tau_c$  ratio for  $S^2=0.8$ . Synthetic relaxation rates  $R_I$ ,  $R_{C/C'-C\alpha}$  and  $R_{C/C'-N}$  were generated with random noise as specified in the description above.

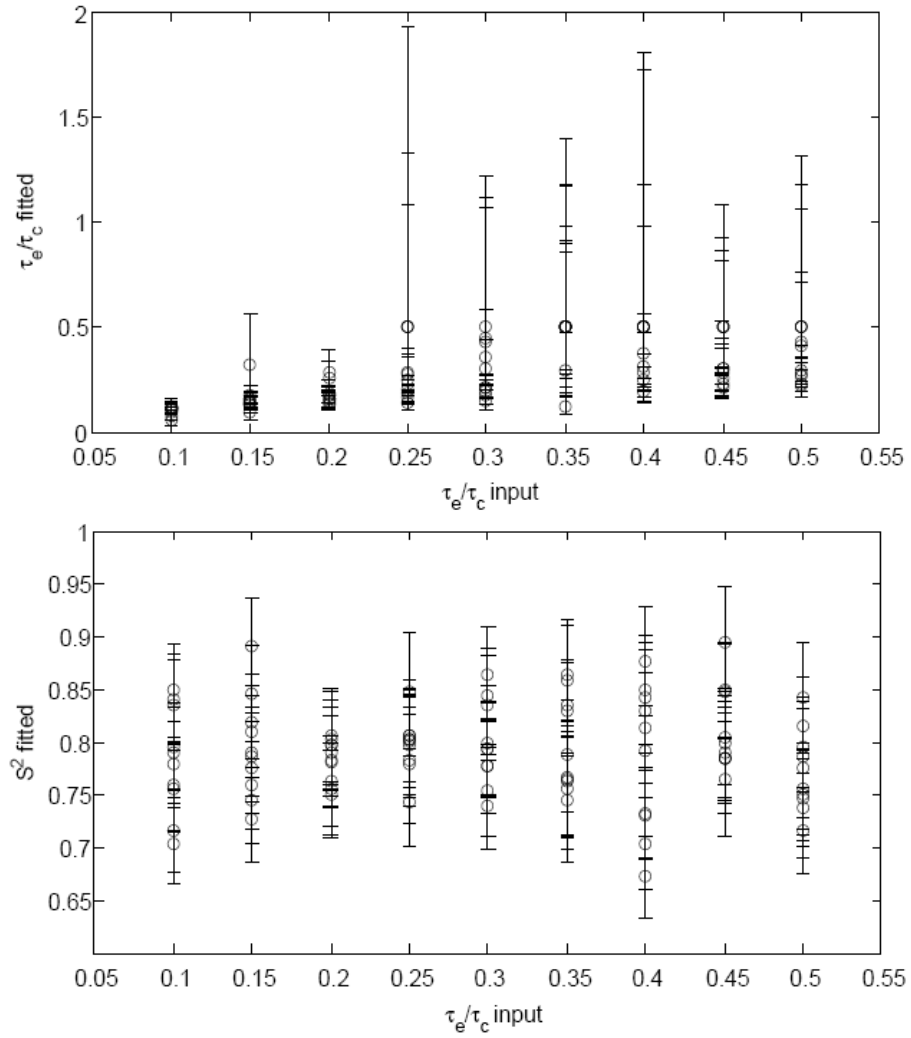

## S2. Experimental $R_I$ , $R_{C/C\alpha}$ and $R_{C/N}$ rates.

2 °C

| <i>residue</i> | $R_I$ | error | $R_{C/C\alpha}$ | error | $R_{C/N}$ | error |
|----------------|-------|-------|-----------------|-------|-----------|-------|
| 41             | 0.887 | 0.039 | -1.12           | 0.06  | 0.26      | 0.06  |
| 42             | 0.777 | 0.027 | -1.10           | 0.09  | 1.00      | 0.13  |
| 43             | 0.725 | 0.010 | -1.37           | 0.06  | 0.62      | 0.06  |
| 45             | 0.782 | 0.018 | -1.25           | 0.09  | 0.86      | 0.08  |
| 47             | 0.756 | 0.007 | -1.40           | 0.13  | 0.98      | 0.12  |
| 48             | 0.729 | 0.025 | -1.11           | 0.06  | 0.76      | 0.06  |
| 49             | 0.707 | 0.019 | -1.43           | 0.09  | 0.79      | 0.11  |
| 50             | 0.773 | 0.028 | -1.35           | 0.12  | 0.80      | 0.14  |
| 51             | 0.788 | 0.026 | -1.00           | 0.09  | 0.57      | 0.07  |
| 54             | 0.781 | 0.015 | -1.14           | 0.07  | 0.68      | 0.06  |
| 55             | 0.844 | 0.018 | -1.45           | 0.10  | 0.63      | 0.07  |
| 56             | 0.809 | 0.013 | -1.32           | 0.11  | 1.22      | 0.43  |
| 57             | 0.833 | 0.032 | -1.55           | 0.17  | 0.91      | 0.09  |
| 58             | 0.743 | 0.029 | -1.34           | 0.09  | 0.59      | 0.06  |
| 59             | 0.763 | 0.025 | -1.21           | 0.06  | 0.70      | 0.06  |
| 62             | 0.787 | 0.024 | -1.29           | 0.06  | 0.78      | 0.05  |
| 63             | 0.769 | 0.019 | -1.30           | 0.05  | 0.57      | 0.06  |
| 64             | 0.808 | 0.015 | -1.64           | 0.19  | 0.56      | 0.16  |
| 65             | 0.734 | 0.035 | -1.53           | 0.09  | 0.96      | 0.13  |
| 66             | 0.831 | 0.030 | -1.29           | 0.08  | 0.69      | 0.06  |
| 67             | 0.790 | 0.024 | -1.17           | 0.08  | 0.65      | 0.05  |
| 68             | 0.741 | 0.034 | -1.35           | 0.13  | 0.84      | 0.14  |
| 69             | 0.773 | 0.022 | -1.31           | 0.09  | 0.67      | 0.07  |
| 70             | 0.796 | 0.012 | -1.08           | 0.08  | 0.66      | 0.05  |
| 71             | 0.755 | 0.019 | -1.31           | 0.09  | 0.76      | 0.07  |
| 72             | 0.751 | 0.019 | -1.11           | 0.07  | 0.64      | 0.05  |
| 73             | 0.778 | 0.022 | -0.97           | 0.11  | 0.66      | 0.07  |
| 74             | 0.750 | 0.027 | -1.10           | 0.17  | 0.82      | 0.20  |
| 75             | 0.802 | 0.014 | -1.04           | 0.05  | 0.42      | 0.05  |

6 °C

| <i>residue</i> | $R_I$ | error | $R_{C/C\alpha}$ | error | $R_{C/N}$ | error |
|----------------|-------|-------|-----------------|-------|-----------|-------|
| 41             | 1.013 | 0.012 | -1.03           | 0.06  | 0.74      | 0.11  |
| 42             | 0.888 | 0.014 | -1.06           | 0.06  | 0.51      | 0.05  |
| 43             | 0.874 | 0.015 | -1.00           | 0.04  | 0.51      | 0.03  |
| 45             | 0.875 | 0.015 | -1.06           | 0.05  | 0.53      | 0.05  |
| 47             | 0.894 | 0.017 | -0.98           | 0.06  | 0.67      | 0.05  |
| 48             | 0.856 | 0.012 | -0.76           | 0.03  | 0.59      | 0.03  |
| 49             | 0.781 | 0.017 | -0.97           | 0.05  | 0.63      | 0.05  |
| 50             | 0.922 | 0.016 | -1.24           | 0.09  | 0.53      | 0.11  |
| 51             | 0.886 | 0.031 | -0.92           | 0.09  | 0.44      | 0.04  |
| 54             | 0.873 | 0.033 | -1.05           | 0.05  | 0.44      | 0.04  |
| 55             | 0.987 | 0.021 | -0.91           | 0.05  | 0.55      | 0.04  |
| 56             | 0.884 | 0.028 | -1.24           | 0.04  | 0.47      | 0.09  |
| 57             | 0.938 | 0.017 | -0.81           | 0.05  | 0.60      | 0.05  |
| 58             | 0.877 | 0.021 | -1.06           | 0.05  | 0.56      | 0.06  |
| 59             | 0.849 | 0.009 | -1.00           | 0.04  | 0.48      | 0.04  |

|    |       |       |       |      |      |      |
|----|-------|-------|-------|------|------|------|
| 62 | 0.888 | 0.013 | -1.09 | 0.04 | 0.60 | 0.04 |
| 63 | 0.886 | 0.025 | -1.08 | 0.06 | 0.45 | 0.05 |
| 64 | 0.878 | 0.028 | -0.93 | 0.09 | 0.56 | 0.07 |
| 65 | 0.878 | 0.012 | -1.11 | 0.06 | 0.46 | 0.05 |
| 66 | 0.921 | 0.021 | -1.01 | 0.05 | 0.52 | 0.04 |
| 67 | 0.886 | 0.018 | -0.94 | 0.05 | 0.53 | 0.03 |
| 68 | 0.870 | 0.021 | -1.20 | 0.11 | 0.57 | 0.08 |
| 69 | 0.894 | 0.011 | -1.03 | 0.05 | 0.56 | 0.04 |
| 70 | 0.900 | 0.013 | -0.91 | 0.05 | 0.56 | 0.03 |
| 71 | 0.865 | 0.011 | -0.95 | 0.04 | 0.50 | 0.04 |
| 72 | 0.906 | 0.018 | -0.90 | 0.05 | 0.58 | 0.04 |
| 73 | 0.888 | 0.008 | -0.75 | 0.03 | 0.58 | 0.07 |
| 74 | 0.844 | 0.011 | -0.97 | 0.12 | 0.49 | 0.06 |
| 75 | 0.855 | 0.010 | -0.86 | 0.04 | 0.24 | 0.03 |

12 °C

| <i>residue</i> | $R_I$ | error | $R_{C/C\alpha}$ | error | $R_{C/C'N}$ | error |
|----------------|-------|-------|-----------------|-------|-------------|-------|
| 41             | 1.128 | 0.058 | -0.77           | 0.05  | 0.26        | 0.05  |
| 42             | 0.985 | 0.026 | -0.80           | 0.05  | 0.50        | 0.04  |
| 43             | 0.978 | 0.012 | -0.89           | 0.03  | 0.45        | 0.03  |
| 45             | 0.969 | 0.013 | -0.83           | 0.05  | 0.51        | 0.04  |
| 47             | 0.995 | 0.026 | -0.85           | 0.06  | 0.55        | 0.04  |
| 48             | 0.970 | 0.006 | -0.87           | 0.03  | 0.48        | 0.03  |
| 49             | 0.893 | 0.009 | -0.87           | 0.05  | 0.51        | 0.05  |
| 50             | 0.950 | 0.030 | -1.06           | 0.07  | 0.40        | 0.06  |
| 51             | 0.990 | 0.018 | -0.84           | 0.08  | 0.38        | 0.03  |
| 54             | 0.964 | 0.019 | -0.88           | 0.04  | 0.44        | 0.04  |
| 55             | 1.065 | 0.013 | -0.89           | 0.05  | 0.51        | 0.04  |
| 56             | 0.968 | 0.026 | -0.73           | 0.05  | 0.50        | 0.11  |
| 57             | 1.020 | 0.017 | -0.92           | 0.05  | 0.58        | 0.04  |
| 58             | 0.999 | 0.026 | -0.91           | 0.04  | 0.51        | 0.04  |
| 59             | 0.970 | 0.017 | -0.97           | 0.04  | 0.45        | 0.03  |
| 62             | 0.962 | 0.018 | -0.92           | 0.04  | 0.47        | 0.03  |
| 63             | 0.946 | 0.025 | -0.93           | 0.04  | 0.43        | 0.04  |
| 64             | 1.008 | 0.016 | -0.88           | 0.09  | 1.16        | 0.17  |
| 65             | 0.983 | 0.021 | -0.85           | 0.04  | 0.34        | 0.14  |
| 66             | 0.988 | 0.012 | -1.04           | 0.07  | 0.55        | 0.04  |
| 67             | 0.999 | 0.018 | -0.84           | 0.04  | 0.52        | 0.03  |
| 68             | 0.935 | 0.041 | -0.96           | 0.07  | 0.35        | 0.03  |
| 69             | 0.990 | 0.032 | -0.91           | 0.04  | 0.42        | 0.04  |
| 70             | 0.993 | 0.025 | -0.73           | 0.04  | 0.47        | 0.04  |
| 71             | 0.964 | 0.017 | -0.87           | 0.04  | 0.43        | 0.03  |
| 72             | 0.993 | 0.003 | -0.80           | 0.04  | 0.48        | 0.04  |
| 73             | 0.977 | 0.007 | -0.94           | 0.06  | 0.41        | 0.05  |
| 74             | 0.919 | 0.029 | -0.71           | 0.08  | 0.52        | 0.08  |
| 75             | 0.873 | 0.009 | -0.78           | 0.03  | 0.21        | 0.04  |

16 °C

| <i>residue</i> | $R_I$ | error | $R_{C/C\alpha}$ | error | $R_{C/C'N}$ | error |
|----------------|-------|-------|-----------------|-------|-------------|-------|
| 41             | 1.226 | 0.041 | -0.69           | 0.06  | 0.32        | 0.05  |
| 42             | 1.063 | 0.017 | -0.71           | 0.05  | 0.45        | 0.04  |

|    |       |       |       |      |      |      |
|----|-------|-------|-------|------|------|------|
| 43 | 1.051 | 0.033 | -0.85 | 0.04 | 0.39 | 0.03 |
| 45 | 1.022 | 0.029 | -0.80 | 0.04 | 0.40 | 0.04 |
| 47 | 1.032 | 0.017 | -0.77 | 0.05 | 0.48 | 0.06 |
| 48 | 1.074 | 0.014 | -0.70 | 0.03 | 0.41 | 0.03 |
| 49 | 1.006 | 0.027 | -0.86 | 0.05 | 0.42 | 0.05 |
| 50 | 1.043 | 0.015 | -0.78 | 0.07 | 0.42 | 0.06 |
| 51 | 0.998 | 0.012 | -0.72 | 0.07 | 0.38 | 0.03 |
| 54 | 1.073 | 0.016 | -0.79 | 0.04 | 0.39 | 0.03 |
| 55 | 1.167 | 0.014 | -0.73 | 0.05 | 0.39 | 0.06 |
| 56 | 1.078 | 0.014 | -0.76 | 0.06 | 0.35 | 0.03 |
| 57 | 1.157 | 0.033 | -0.62 | 0.04 | 0.39 | 0.03 |
| 58 | 1.049 | 0.022 | -0.90 | 0.05 | 0.37 | 0.03 |
| 59 | 1.005 | 0.014 | -0.82 | 0.05 | 0.55 | 0.05 |
| 62 | 1.078 | 0.019 | -0.75 | 0.04 | 0.40 | 0.03 |
| 63 | 1.015 | 0.019 | -0.84 | 0.05 | 0.34 | 0.03 |
| 64 | 1.064 | 0.030 | -0.73 | 0.05 | 0.40 | 0.04 |
| 65 | 1.019 | 0.018 | -0.88 | 0.04 | 0.16 | 0.02 |
| 66 | 1.060 | 0.016 | -0.75 | 0.04 | 0.42 | 0.04 |
| 67 | 1.078 | 0.021 | -0.76 | 0.04 | 0.41 | 0.04 |
| 68 | 0.993 | 0.055 | -0.98 | 0.07 | 0.28 | 0.03 |
| 69 | 1.056 | 0.012 | -0.80 | 0.05 | 0.44 | 0.04 |
| 70 | 1.069 | 0.029 | -0.56 | 0.04 | 0.32 | 0.03 |
| 71 | 1.040 | 0.008 | -0.72 | 0.04 | 0.52 | 0.05 |
| 72 | 1.111 | 0.028 | -0.68 | 0.04 | 0.34 | 0.03 |
| 73 | 1.030 | 0.024 | -1.07 | 0.08 | 0.58 | 0.06 |
| 74 | 0.950 | 0.009 | -0.70 | 0.08 | 0.10 | 0.02 |
| 75 | 0.890 | 0.013 | -0.72 | 0.03 | 0.21 | 0.02 |

22 °C.  $R_{C\prime C\prime N}$  rates are reported for the relaxation delay of 80ms. The rates determined from the relaxation delay of 60ms agree within the experimental errors.

| <i>residue</i> | $R_I$ | error | $R_{C\prime C\prime \alpha}$ | error | $R_{C\prime C\prime N}$ | error |
|----------------|-------|-------|------------------------------|-------|-------------------------|-------|
| 41             | 1.245 | 0.058 | -0.87                        | 0.05  | 0.27                    | 0.09  |
| 42             | 1.132 | 0.015 | -0.58                        | 0.03  | 0.29                    | 0.02  |
| 43             | 1.118 | 0.015 | -0.89                        | 0.19  | 0.27                    | 0.02  |
| 45             | 1.209 | 0.087 | -0.59                        | 0.07  | 0.38                    | 0.02  |
| 47             | 1.124 | 0.014 | -0.72                        | 0.04  | 0.36                    | 0.03  |
| 48             | 1.140 | 0.011 | -0.55                        | 0.02  | 0.38                    | 0.03  |
| 49             | 1.051 | 0.015 | -0.65                        | 0.03  | 0.37                    | 0.03  |
| 50             | 1.392 | 0.073 | -0.58                        | 0.02  | 0.32                    | 0.03  |
| 51             | 1.161 | 0.012 | -0.78                        | 0.05  | 0.32                    | 0.02  |
| 54             | 1.147 | 0.010 | -0.61                        | 0.02  | 0.35                    | 0.02  |
| 55             | 1.295 | 0.024 | -0.52                        | 0.03  | 0.43                    | 0.03  |
| 56             | 1.144 | 0.018 | -0.66                        | 0.02  | 0.24                    | 0.03  |
| 57             | 1.193 | 0.017 | -0.63                        | 0.02  | 0.35                    | 0.03  |
| 58             | 1.147 | 0.018 | -0.57                        | 0.05  | 0.28                    | 0.02  |
| 59             | 1.101 | 0.016 | -0.78                        | 0.05  | 0.43                    | 0.03  |
| 62             | 1.143 | 0.021 | -0.58                        | 0.03  | 0.35                    | 0.02  |
| 63             | 1.086 | 0.020 | -0.75                        | 0.04  | 0.42                    | 0.03  |
| 64             | 1.156 | 0.013 | -0.60                        | 0.03  | 0.36                    | 0.03  |
| 65             | 1.141 | 0.018 | -0.62                        | 0.03  | 0.34                    | 0.03  |
| 66             | 1.222 | 0.008 | -0.73                        | 0.03  | 0.45                    | 0.03  |

|    |       |       |       |      |      |      |
|----|-------|-------|-------|------|------|------|
| 67 | 1.131 | 0.013 | -0.73 | 0.03 | 0.35 | 0.02 |
| 68 | 1.064 | 0.026 | -0.71 | 0.03 | 0.38 | 0.04 |
| 69 | 1.236 | 0.210 | -0.66 | 0.03 | 0.40 | 0.03 |
| 70 | 1.159 | 0.014 | -0.60 | 0.03 | 0.32 | 0.02 |
| 71 | 1.055 | 0.060 | -0.70 | 0.03 | 0.34 | 0.02 |
| 72 | 1.169 | 0.007 | -0.75 | 0.03 | 0.37 | 0.02 |
| 73 | 1.096 | 0.011 | -0.64 | 0.03 | 0.29 | 0.02 |
| 74 | 1.027 | 0.014 | -0.41 | 0.04 | 0.29 | 0.03 |
| 75 | 0.943 | 0.005 | -0.67 | 0.02 | 0.19 | 0.02 |

**S3.** Averaged fitted values of  $\theta$  for those residues for which the data were obtained for at least three temperatures out of 2, 6, 12, and 16 °C..

| residue | $\theta$ , degrees |
|---------|--------------------|
| 41      | $161.6 \pm 2.5$    |
| 42      | $148.8 \pm 1.8$    |
| 43      | $154.7 \pm 1.1$    |
| 45      | $151.8 \pm 1.8$    |
| 47      | $149.2 \pm 1.2$    |
| 48      | $147.0 \pm 1.4$    |
| 49      | $152.3 \pm 2.0$    |
| 50      | $156.7 \pm 3.0$    |
| 51      | $153.7 \pm 2.0$    |
| 54      | $154.0 \pm 1.3$    |
| 55      | $156.8 \pm 2.2$    |
| 56      | $156.9 \pm 4.6$    |
| 57      | $146.6 \pm 2.2$    |
| 58      | $155.9 \pm 1.5$    |
| 59      | $154.6 \pm 1.5$    |
| 62      | $152.9 \pm 1.3$    |
| 63      | $159.2 \pm 1.8$    |
| 64      | $154.2 \pm 3.2$    |
| 65      | $165.3 \pm 4.8$    |
| 66      | $153.5 \pm 1.7$    |
| 67      | $151.3 \pm 1.5$    |
| 68      | $160.9 \pm 4.1$    |
| 69      | $154.7 \pm 1.8$    |
| 70      | $147.9 \pm 1.7$    |
| 71      | $151.9 \pm 1.7$    |
| 72      | $150.2 \pm 1.5$    |
| 73      | $148.2 \pm 2.6$    |
| 74      | $154.8 \pm 7.0$    |
| 75      | $166.0 \pm 2.3$    |



#### S4. <sup>13</sup>CO chemical shifts

| res | 8c    | 20c   |
|-----|-------|-------|
| 41  | 169.7 | 170.0 |
| 42  | 175.5 | 175.5 |
| 43  | 171.4 | 171.8 |
| 44  | 176.7 | 176.7 |
| 45  | 176.5 | 176.7 |
| 46  | 175.1 | 175.3 |
| 46  | 174.6 | 174.8 |
| 48  | 176.9 | 177.2 |
| 49  | 176.7 | 176.9 |
| 50  | 174.8 | 174.8 |
| 51  | 174.1 | 174.4 |
| 52  | 170.2 | 170.4 |
| 53  | 169.7 | 170.0 |
| 54  | 173.0 | 173.2 |
| 55  | 176.9 | 176.9 |
| 56  | 173.4 | 173.7 |
| 57  | 178.6 | 178.6 |
| 58  | 174.6 | 174.1 |
| 59  | 175.1 | 175.3 |
| 60  | 173.4 | 173.4 |
| 62  | 174.8 | 175.3 |
| 63  | 175.8 | 175.8 |
| 64  | 175.1 | 175.3 |
| 65  | 175.3 | 175.5 |
| 66  | 176.0 | 176.2 |
| 67  | 176.2 | 176.2 |
| 68  | 175.3 | 175.5 |
| 69  | 176.7 | 176.9 |
| 70  | 176.2 | 176.5 |
| 71  | 177.2 | 177.2 |
| 72  | 176.2 | 176.5 |
| 73  | 174.1 | 174.4 |
| 74  | 171.4 | 171.6 |
| 75  | 172.3 | 172.3 |

**SI5. Graphs of  $1-S$  vs  $T$  for all residues for which the data were obtained for at least three temperatures out of 2, 6, 12, and 16 °C.**

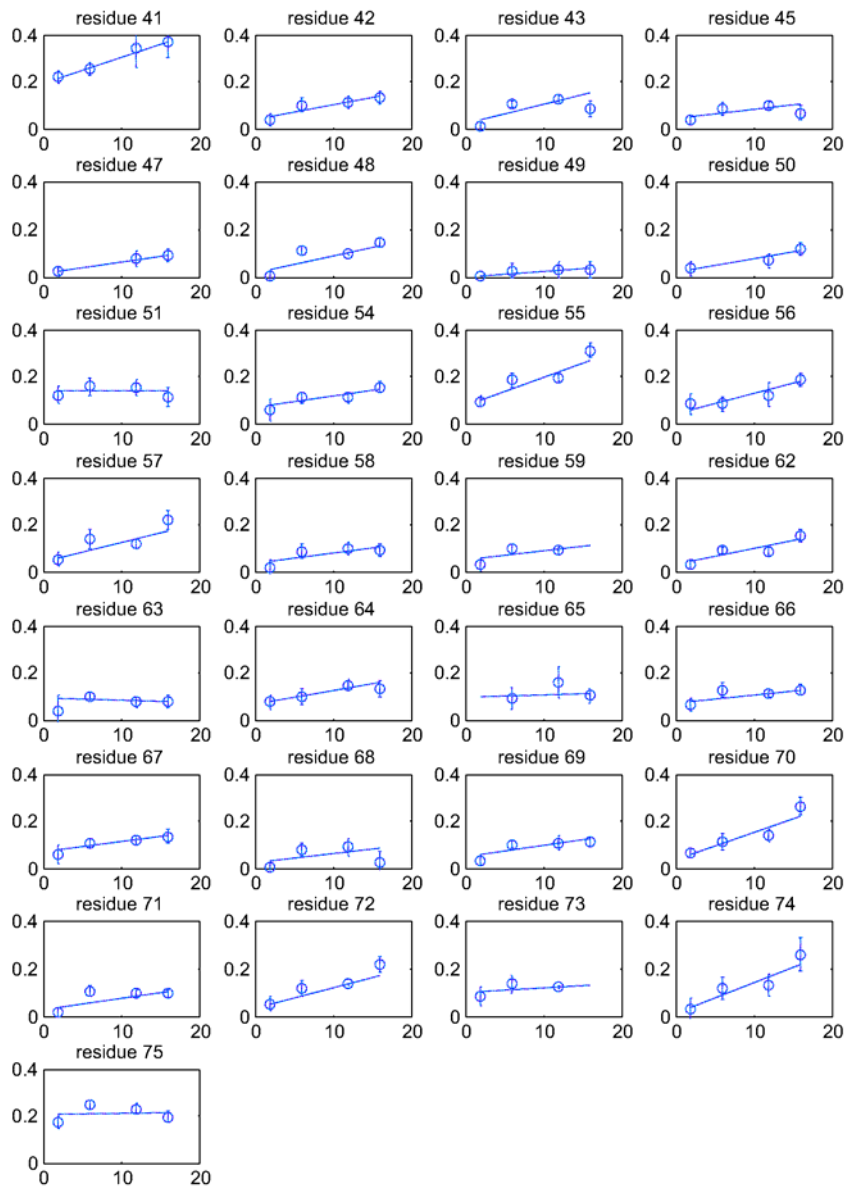

Supplement: NIHMS375773-supplement-SI.pdf [file NIHMS375773-supplement-SI.pdf]
